# Supplementary material for: Construction of Mn0.5Zn0.5Fe2O4 modified TiO2 nanotube array nanocomposite electrodes and their photoelectrocatalytic performance in the degradation of 2,4-DCP
Source: Royal Society of Chemistry journal article supplement (doi:10.1039/c5tc01008j), 2015-01-01
Supplement: c5tc01008j1.pdf [file c5tc01008j1.pdf]

### Electronic Supplementary information

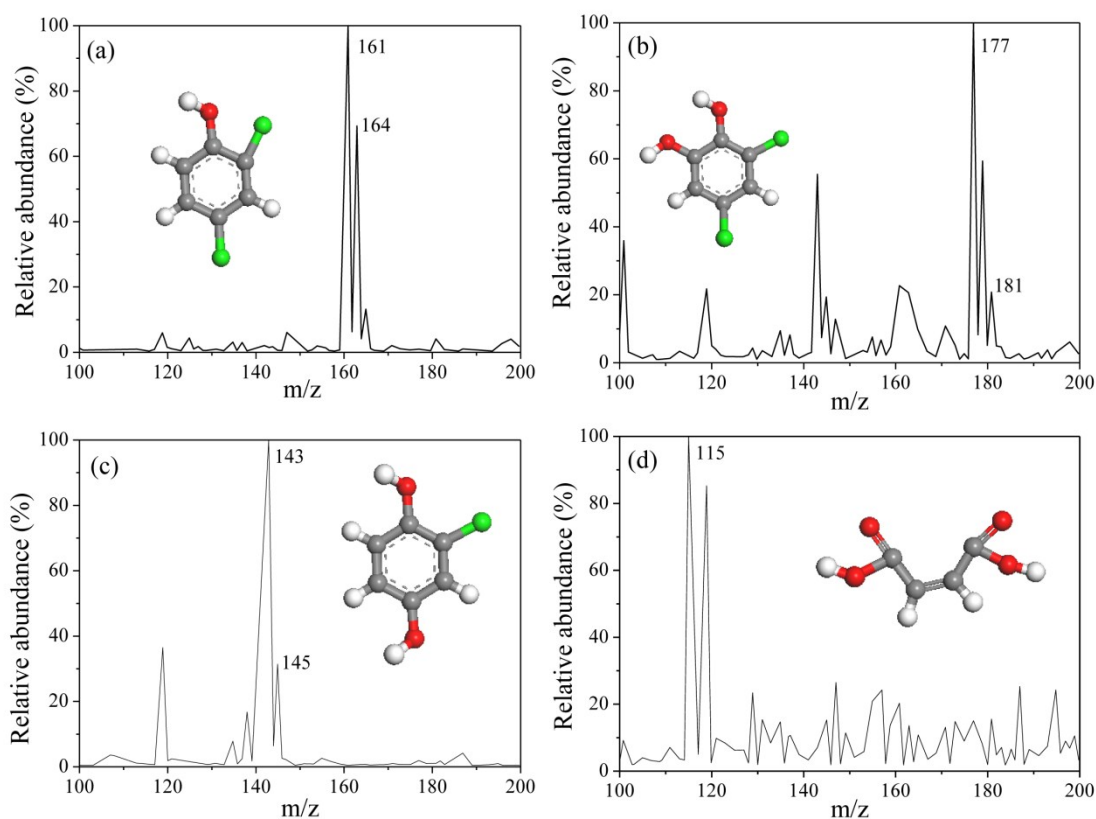

Fig. 1 The mass spectra obtained from the 2,4-DCP photodegradation over  $\text{Mn}_{0.5}\text{Zn}_{0.5}\text{Fe}_2\text{O}_4/\text{TiO}_2$  NTAs electrode under simulated sunlight irradiation.

Figure 1 a is the mass spectrum of 2,4-DCP, Fig 1 b-d show the 2,4-DCP, 2-chloro-1,4-benzenediol (or 4-chloro-1,2-benzenediol), and 3,5-dichlorocatechol mass spectra, respectively.
